# Supplementary material
Source: PubMed Central journal article supplement (PMC441491)
Supplement: nar_32_suppl-2_W475__1.pdf [file nar_32_suppl-2_W475__1.pdf]

| Gene     | Unigene ID | Accession | Gene     | Unigene ID | Accession |
|----------|------------|-----------|----------|------------|-----------|
| TCFL4    | Hs.78185   | NM_013383 | C5orf3   | Hs.166551  | NM_018691 |
| NCBP2    | Hs.240770  | NM_007362 | PKD1     | Hs.75813   | NM_000296 |
| MYBPC3   | Hs.258742  | NM_000256 | ALKBH    | Hs.54418   | NM_006020 |
| CA6      | Hs.100322  | NM_001215 | MAPK1    | Hs.324473  | NM_002745 |
| KIAA0275 | Hs.74583   | NM_014767 | BIN1     | Hs.193163  | NM_004305 |
| HMGN1    | Hs.251064  | NM_004965 | LOC51194 | Hs.13109   | NM_016338 |
| AMID     | Hs.117062  | NM_032797 | P2RXL1   | Hs.113275  | NM_005446 |
| NEU4     | Hs.302024  | NM_080741 | RPL10A   | Hs.76067   | NM_007104 |
| TSP-NY   | Hs.97643   | NM_032573 | PEA15    | Hs.194673  | NM_003768 |
| USP2     | Hs.125902  | NM_004205 | EML2     | Hs.24178   | NM_012155 |
| UMPK     | Hs.95734   | NM_012474 | OAZ1     | Hs.283767  | NM_004152 |
| MMP28    | Hs.231958  | NM_024302 | MSL3L1   | Hs.88764   | NM_006800 |
| Enah     | Hs.241471  | NM_016337 | SPG4     | Hs.26334   | NM_014946 |
| DYRK3    | Hs.38018   | NM_003582 | FLJ12528 | Hs.288974  | NM_025150 |
| INPP1    | Hs.32309   | NM_002194 | PDPK1    | Hs.154729  | NM_002613 |
| SKD3     | Hs.21263   | NM_030813 | PSME3    | Hs.152978  | NM_005789 |
| RPL3     | Hs.119598  | NM_000967 | L3MBTL2  | Hs.265327  | NM_031488 |
| JTB      | Hs.323093  | NM_006694 | BRAP     | Hs.122764  | NM_006768 |
| BMP7     | Hs.170195  | NM_001719 | GRP58    | Hs.13751   | AI807482  |
| FOXP3    | Hs.247700  | NM_014009 | RGS16    | Hs.183601  | NM_002928 |
| TCF3     | Hs.101047  | NM_003200 |          |            |           |

**Supplementary Table 1:** List of 41 default control genes used in these studies.

## FKHR Class I Target Genes

| Symbol  | Unigene ID | Accession |
|---------|------------|-----------|
| ALDH8A1 | Hs.18443   | NM_022568 |
| BTG1    | Hs.77054   | NM_001731 |
| C8orf1  | Hs.40539   | NM_004337 |
| CP      | Hs.296634  | NM_000096 |
| DAF     | Hs.1369    | NM_000574 |
| DHODH   | Hs.94925   | NM_001361 |
| EPS8    | Hs.2132    | NM_004447 |
| GAB1    | Hs.239706  | NM_002039 |
| GCA     | Hs.79381   | NM_012198 |
| GPR49   | Hs.166705  | NM_003667 |
| GUCY1A3 | Hs.75295   | NM_000856 |
| HDLBP   | Hs.177516  | NM_005336 |
| IGFBP1  | Hs.102122  | NM_000596 |
| LUM     | Hs.79914   | NM_002345 |
| MAP3K6  | Hs.194694  | NM_004672 |
| MYO6    | Hs.118483  | NM_004999 |
| RTN3    | Hs.252831  | NM_006054 |
| SEMA3C  | Hs.171921  | NM_006379 |
| SOX4    | Hs.83484   | NM_003107 |
| ZNF187  | Hs.237786  | NM_152736 |

## FKHR Class IIA Target Genes

| Symbol  | Unigene ID | Accession |
|---------|------------|-----------|
| CNR1    | Hs.75110   | NM_001840 |
| PA26    | Hs.14125   | NM_014454 |
| FZD4    | Hs.19545   | NM_012193 |
| KLHL4   | Hs.49075   | NM_019117 |
| TCF4    | Hs.326198  | NM_003199 |
| TGFBR3  | Hs.342874  | NM_003243 |
| TPST1   | Hs.421194  | NM_003596 |
| SMARCB1 | Hs.159971  | NM_003073 |
| IGFBP7  | Hs.119206  | NM_001553 |
| MBNL2   | Hs.283609  | NM_005757 |
| DDB1    | Hs.108327  | NM_001923 |
| BHC80   | Hs.106826  | NM_016621 |
| BCL6    | Hs.155024  | NM_001706 |

## FKHR Class IIB Target Genes

| Symbol   | Unigene ID | Accession |
|----------|------------|-----------|
| BCMP1    | Hs.8769    | NM_031442 |
| PLEKHB2  | Hs.246885  | NM_017958 |
| 3PAP     | Hs.93872   | NM_019061 |
| NCOA1    | Hs.74002   | NM_003743 |
| RPGR     | Hs.153614  | NM_000328 |
| ID1      | Hs.75424   | NM_002165 |
| LOC83693 | Hs.171937  | NM_031463 |
| FKBP5    | Hs.7557    | NM_004117 |
| TUBB1    | Hs.303023  | NM_030773 |
| SLC11A2  | Hs.57435   | NM_000617 |
| ATRN     | Hs.194019  | NM_012070 |
| GLUL     | Hs.170171  | NM_002065 |
| SLC5A3   | Hs.324787  | NM_006933 |
| MMP7     | Hs.2256    | NM_002423 |
| PTPRC    | Hs.170121  | NM_002838 |
| MSL3L1   | Hs.88764   | NM_006800 |
| STAT2    | Hs.72988   | NM_005419 |
| OSBPL3   | Hs.197955  | NM_015550 |
| MXI1     | Hs.118630  | NM_005962 |
| FKBP1B   | Hs.77643   | NM_004116 |
| ARG2     | Hs.172851  | NM_001172 |
| MRPS6    | Hs.424751  | NM_032476 |
| TP53INP1 | Hs.75497   | NM_033285 |
| MGC2541  | Hs.173103  | NM_080670 |
| SRPX     | Hs.15154   | NM_006307 |
| SYT13    | Hs.12365   | NM_020826 |

## FKHR Class III Target Genes

| Symbol   | Unigene ID | Accession |
|----------|------------|-----------|
| EEG1     | Hs.274453  | NM_017611 |
| PCNA     | Hs.78996   | NM_002592 |
| DDX31    | Hs.69331   | NM_022779 |
| JTV1     | Hs.301613  | NM_006303 |
| NCL      | Hs.79110   | NM_005381 |
| APOC4    | Hs.110675  | NM_001646 |
| FREQ     | Hs.301760  | NM_014286 |
| CDK4     | Hs.95577   | NM_000075 |
| SLC16A3  | Hs.323477  | NM_004207 |
| CCND1    | Hs.82932   | NM_001758 |
| SCAND1   | Hs.274411  | NM_016558 |
| IFRD2    | Hs.315177  | NM_006764 |
| FHOD1    | Hs.95231   | NM_013241 |
| KIAA0664 | Hs.22616   | NM_015229 |
| CCND2    | Hs.75586   | NM_001759 |
| P37NB    | Hs.155545  | NM_005824 |
| IGFBP3   | Hs.77326   | NM_000598 |
| VAMP2    | Hs.25348   | NM_014232 |
| TNFSF7   | Hs.99899   | NM_001252 |
| CCNE2    | Hs.30464   | NM_004702 |
| CDC45L   | Hs.114311  | NM_003504 |
| STK12    | Hs.180655  | NM_004217 |
| EREG     | Hs.115263  | NM_001432 |
| MCM6     | Hs.155462  | NM_005915 |

**Supplementary Table 2:** FKHR target genes from Ramaswamy et al.

Conserved Transcription Factor Binding Sites - CONSOLIDATED

| TFBSs  | mean   | stderr | FKHR Class I genes |         |       |      |    |      |         |       |        |     |      |        |        |     |       |        |      |        |     |   |   |   |
|--------|--------|--------|--------------------|---------|-------|------|----|------|---------|-------|--------|-----|------|--------|--------|-----|-------|--------|------|--------|-----|---|---|---|
|        |        |        | SOX4               | GUCY1A3 | DHODH | RTN3 | CP | BTG1 | ALDH8A1 | HDLBP | MAP3K6 | DAF | MYO6 | IGFBP1 | C8orf1 | GCA | GPR49 | ZNF187 | EPS8 | SEMA3C | LUM |   |   |   |
| CAAT   | CAAT   | 1.6    | 0.53               | 7       | 0     | 0    | 0  | 2    | 1       | 2     | 0      | 0   | 2    | 0      | 0      | 0   | 1     | 0      | 0    | 8      | 0   | 1 | 2 | 1 |
| HFH8   | FOXF1  | 0.9    | 0.26               | 1       | 0     | 0    | 0  | 1    | 1       | 3     | 0      | 0   | 0    | 0      | 0      | 3   | 0     | 0      | 2    | 0      | 0   | 0 | 2 | 2 |
| HFH3   | FOXJ1  | 2.1    | 0.64               | 3       | 0     | 0    | 0  | 4    | 5       | 5     | 0      | 0   | 0    | 0      | 0      | 3   | 0     | 0      | 9    | 0      | 0   | 0 | 3 | 2 |
| FOXJ2  | FOXJ2  | 1.5    | 0.46               | 3       | 0     | 0    | 0  | 1    | 2       | 6     | 0      | 0   | 0    | 0      | 0      | 4   | 0     | 0      | 6    | 0      | 0   | 0 | 3 | 2 |
| FOXO4  | FOXO4  | 2.2    | 0.68               | 5       | 0     | 0    | 0  | 5    | 2       | 8     | 0      | 0   | 0    | 0      | 0      | 5   | 0     | 1      | 10   | 0      | 0   | 0 | 5 | 2 |
| GFH1   | GFH1   | 1.95   | 0.72               | 10      | 0     | 0    | 0  | 3    | 0       | 2     | 0      | 0   | 0    | 0      | 0      | 1   | 0     | 1      | 9    | 0      | 0   | 0 | 7 | 1 |
| LPOLYA | LPOLYA | 0.85   | 0.39               | 3       | 0     | 0    | 0  | 1    | 2       | 0     | 0      | 0   | 1    | 0      | 0      | 0   | 0     | 0      | 7    | 0      | 0   | 0 | 0 | 0 |
| NFY    | NFY    | 1.5    | 0.48               | 9       | 0     | 0    | 0  | 3    | 2       | 2     | 0      | 0   | 0    | 0      | 0      | 0   | 0     | 0      | 4    | 0      | 0   | 2 | 2 | 2 |
| S8     | S8 HOX | 1.45   | 0.67               | 3       | 0     | 0    | 0  | 1    | 2       | 0     | 0      | 0   | 0    | 0      | 0      | 0   | 0     | 0      | 12   | 0      | 0   | 0 | 4 | 0 |
| SOX9   | SOX9   | 0.8    | 0.26               | 3       | 0     | 0    | 0  | 1    | 1       | 2     | 0      | 0   | 0    | 0      | 0      | 1   | 0     | 1      | 4    | 0      | 0   | 0 | 1 | 0 |

Conserved Transcription Factor Binding Sites - CONSOLIDATED

| TFBSs  | mean   | stderr | Control Genes |       |        |     |          |       |      |      |        |      |      |       |      |       |       |      |      |     |      |   |   |    |
|--------|--------|--------|---------------|-------|--------|-----|----------|-------|------|------|--------|------|------|-------|------|-------|-------|------|------|-----|------|---|---|----|
|        |        |        | TCFL4         | NCBP2 | MYBPC3 | CA6 | KIAA0275 | HMGNI | AMID | NEU4 | TSP-NY | USP2 | UMPK | MMP28 | Enah | DYRK3 | INPP1 | SKD3 | RPL3 | JTB | BMP7 |   |   |    |
| CAAT   | CAAT   | 0.56   | 0.16          | 1     | 0      | 0   | 0        | 1     | 0    | 0    | 0      | 0    | 0    | 0     | 0    | 0     | 0     | 0    | 0    | 0   | 0    | 0 | 0 | 4  |
| HFH8   | FOXF1  | 0.37   | 0.13          | 1     | 0      | 0   | 0        | 3     | 0    | 0    | 0      | 0    | 0    | 0     | 0    | 3     | 0     | 0    | 0    | 0   | 0    | 0 | 0 | 1  |
| HFH3   | FOXJ1  | 0.66   | 0.27          | 1     | 0      | 0   | 0        | 2     | 0    | 0    | 0      | 0    | 0    | 0     | 0    | 3     | 0     | 0    | 0    | 0   | 0    | 0 | 0 | 9  |
| FOXJ2  | FOXJ2  | 0.37   | 0.15          | 1     | 0      | 0   | 0        | 2     | 0    | 0    | 0      | 0    | 0    | 0     | 0    | 2     | 0     | 0    | 1    | 0   | 0    | 0 | 0 | 5  |
| FOXO4  | FOXO4  | 0.76   | 0.33          | 2     | 0      | 0   | 0        | 4     | 0    | 0    | 0      | 0    | 0    | 0     | 4    | 0     | 0     | 0    | 0    | 0   | 0    | 0 | 0 | 12 |
| GFH1   | GFH1   | 0.54   | 0.26          | 0     | 1      | 0   | 0        | 2     | 0    | 0    | 0      | 0    | 0    | 0     | 0    | 0     | 1     | 0    | 1    | 0   | 0    | 1 | 0 | 10 |
| LPOLYA | LPOLYA | 0.05   | 0.03          | 0     | 0      | 0   | 0        | 0     | 0    | 0    | 0      | 0    | 0    | 0     | 0    | 0     | 0     | 0    | 0    | 0   | 0    | 0 | 0 | 1  |
| NFY    | NFY    | 0.71   | 0.25          | 0     | 0      | 0   | 0        | 0     | 1    | 0    | 0      | 0    | 0    | 2     | 0    | 0     | 0     | 0    | 0    | 0   | 0    | 0 | 0 | 8  |
| S8     | S8 HOX | 0.32   | 0.19          | 0     | 0      | 0   | 0        | 0     | 0    | 0    | 0      | 0    | 0    | 0     | 0    | 0     | 0     | 0    | 0    | 0   | 0    | 0 | 0 | 7  |
| SOX9   | SOX9   | 0.29   | 0.1           | 1     | 0      | 0   | 0        | 3     | 1    | 0    | 0      | 0    | 0    | 0     | 0    | 0     | 0     | 0    | 0    | 1   | 0    | 0 | 0 | 2  |

| TFBSs  | mean diff | p value |       |
|--------|-----------|---------|-------|
| CAAT   | CAAT      | 1.04    | 0.049 |
| HFH8   | FOXF1     | 0.53    | 0.037 |
| HFH3   | FOXJ1     | 1.44    | 0.028 |
| FOXJ2  | FOXJ2     | 1.13    | 0.015 |
| FOXO4  | FOXO4     | 1.44    | 0.016 |
| GFH1   | GFH1      | 1.41    | 0.041 |
| LPOLYA | LPOLYA    | 0.8     | 0.005 |
| NFY    | NFY       | 0.79    | 0.046 |
| S8     | S8 HOX    | 1.13    | 0.03  |
| SOX9   | SOX9      | 0.51    | 0.047 |

Supplementary Table 3: CONFAC Tables for TFBSs Significantly enriched in FKHR Class I Genes vs. Control Genes



| Symbol  | Unigene   | Accession |
|---------|-----------|-----------|
| CYR61   | Hs.8867   | NM_001554 |
| ATF3    | Hs.460    | NM_001674 |
| EGR1    | Hs.326035 | NM_001964 |
| DUSP5   | Hs.2128   | NM_004419 |
| LIF     | Hs.2250   | NM_002309 |
| FOSB    | Hs.75678  | NM_006732 |
| NFKBIE  | Hs.182885 | NM_004556 |
| IRF1    | Hs.80645  | NM_002198 |
| CCL20   | Hs.75498  | NM_004591 |
| NR4A1   | Hs.1119   | NM_002135 |
| CXCL10  | Hs.2248   | NM_001565 |
| TNFAIP3 | Hs.211600 | NM_006290 |
| EPHA2   | Hs.171596 | NM_004431 |
| CXCL2   | Hs.75765  | NM_002089 |
| SDC4    | Hs.252189 | NM_002999 |
| ADA     | Hs.1217   | NM_000022 |
| NFKBIA  | Hs.81328  | NM_020529 |
| CXCL3   | Hs.89690  | NM_002090 |
| MAIL    | Hs.301183 | NM_031419 |
| DTR     | Hs.799    | NM_001945 |
| COPEB   | Hs.285313 | NM_001300 |

**Supplementary Table 4:** TNF target genes from Zeng et al.

| <i>Factor</i> | <i>P-Value</i> | <i>Factor</i> | <i>P-Value</i> |
|---------------|----------------|---------------|----------------|
| CREL          | 1.40E-06       | FOXA1         | 0.005          |
| NFKAPPAB65    | 3.00E-06       | SRF           | 0.007          |
| NFKB          | 1.00E-05       | TATA          | 0.007          |
| NFKAPPAB      | 4.50E-05       | FOXJ1         | 0.008          |
| CEBPDELTA     | 1.00E-04       | E47           | 0.009          |
| NFKAPPAB50    | 1.10E-04       | NRF2          | 0.011          |
| ETS2          | 3.20E-04       | FOXO4         | 0.02           |
| ETS1          | 0.001          | CAAT          | 0.021          |
| FOXA2         | 0.001          | TFIIH         | 0.022          |
| AP1           | 0.001          | OCT1 HOX      | 0.022          |
| MTATA         | 0.001          | SREBP1        | 0.026          |
| IK1           | 0.001          | AREB6         | 0.033          |
| MAZ           | 0.001          | FOXJ2         | 0.042          |
| CETS168       | 0.002          | HAND1E47      | 0.043          |
| GFI1          | 0.002          | AML           | 0.043          |
| CETS1P54      | 0.003          | GATA1         | 0.044          |

**Supplementary Table 5:** p-values of TFBSs enriched in TNF target genes.

| Symbol  | Unigene   | Accession |
|---------|-----------|-----------|
| CYR61   | Hs.8867   | NM_001554 |
| ATF3    | Hs.460    | NM_001674 |
| EGR1    | Hs.326035 | NM_001964 |
| DUSP5   | Hs.2128   | NM_004419 |
| LIF     | Hs.2250   | NM_002309 |
| FOSB    | Hs.75678  | NM_006732 |
| NFKBIE  | Hs.182885 | NM_004556 |
| IRF1    | Hs.80645  | NM_002198 |
| CCL20   | Hs.75498  | NM_004591 |
| NR4A1   | Hs.1119   | NM_002135 |
| CXCL10  | Hs.2248   | NM_001565 |
| TNFAIP3 | Hs.211600 | NM_006290 |
| EPHA2   | Hs.171596 | NM_004431 |
| CXCL2   | Hs.75765  | NM_002089 |
| SDC4    | Hs.252189 | NM_002999 |
| ADA     | Hs.1217   | NM_000022 |
| NFKBIA  | Hs.81328  | NM_020529 |
| CXCL3   | Hs.89690  | NM_002090 |
| MAIL    | Hs.301183 | NM_031419 |
| DTR     | Hs.799    | NM_001945 |
| COPEB   | Hs.285313 | NM_001300 |

**Supplementary Table 6:** NF $\kappa$ B target genes from Hinz et al.

| Symbol  | Unigene ID | Accession |
|---------|------------|-----------|
| INS     | Hs.89832   | NM_000207 |
| KLF5    | Hs.84728   | NM_001730 |
| AK3     | Hs.274691  | NM_013410 |
| LGALS4  | Hs.5302    | NM_006149 |
| EPHX1   | Hs.89649   | NM_000120 |
| CEACAM5 | Hs.220529  | NM_004363 |
| TM4SF3  | Hs.84072   | NM_004616 |
| KRT19   | Hs.182265  | NM_002276 |
| ANXA2   | Hs.217493  | NM_004039 |
| MSX1    | Hs.424414  | NM_002448 |
| S100A11 | Hs.417004  | NM_005620 |
| MUC1    | Hs.89603   | NM_002456 |
| EFNA1   | Hs.399713  | NM_004428 |
| S100A13 | Hs.432009  | NM_005979 |
| MYL9    | Hs.9615    | NM_006097 |
| WFDC2   | Hs.2719    | NM_006103 |
| ELF3    | Hs.166096  | NM_004433 |
| PSME2   | Hs.433810  | NM_002818 |
| NPC2    | Hs.433222  | NM_006432 |
| RCN1    | Hs.167791  | NM_002901 |
| CCND1   | Hs.82932   | NM_001758 |
| MGC5560 | Hs.207251  | NM_019054 |
| COL1A2  | Hs.179573  | NM_000089 |
| CYC1    | Hs.289271  | NM_001916 |
| KRT8    | Hs.242463  | NM_002273 |
| BF      | Hs.69771   | NM_001710 |
| IER3    | Hs.76095   | NM_003897 |
| SLPI    | Hs.251754  | NM_003064 |
| LUM     | Hs.79914   | NM_002345 |
| S100A10 | Hs.400250  | NM_002966 |
| KRT18   | Hs.406013  | NM_000224 |

**Supplementary Table 7:** Cyclin D1 target genes from Lamb et al.



| Gene         | Unigene ID | Accession |
|--------------|------------|-----------|
| LIM          | Hs.154103  | NM_006457 |
| SOX4         | Hs.83484   | NM_003107 |
| RCL          | Hs.109752  | NM_006443 |
| NME1         | Hs.118638  | NM_000269 |
| UAP1         | Hs.21293   | NM_003115 |
| POLD2        | Hs.74598   | NM_006230 |
| HDLBP        | Hs.177516  | NM_005336 |
| APRT         | Hs.28914   | NM_000485 |
| DKFZP564B167 | Hs.76285   | NM_015415 |
| PRSS8        | Hs.75799   | NM_002773 |
| ODC1         | Hs.75212   | NM_002539 |
| EBNA1BP2     | Hs.346868  | NM_006824 |
| FAAH         | Hs.288828  | NM_001441 |
| MYC          | Hs.79070   | NM_002467 |
| HPN          | Hs.823     | NM_002151 |
| LIG3         | Hs.100299  | NM_002311 |
| TFF3         | Hs.82961   | NM_003226 |
| TPD52        | Hs.2384    | NM_005079 |
| TRAP1        | Hs.376253  | NM_016292 |
| TRIM14       | Hs.179703  | NM_014788 |
| PAICS        | Hs.117950  | NM_006452 |
| EIF3S2       | Hs.192023  | NM_003757 |
| KRT8         | Hs.242463  | NM_002273 |
| FLJ32389     | Hs.351558  | NM_144617 |
| HIPK2        | Hs.236131  | NM_014075 |
| PRDX4        | Hs.83383   | NM_006406 |
| ARMET        | Hs.75412   | NM_006010 |
| ST14         | Hs.56937   | NM_021978 |
| AMACR        | Hs.128749  | NM_014324 |
| ABHD2        | Hs.99364   | NM_007011 |
| p100         | Hs.79093   | NM_014390 |
| PLAB         | Hs.296638  | NM_004864 |
| KRT18        | Hs.406013  | NM_000224 |

**Supplementary Table 8:** 33 genes up-regulated in Prostate Cancer (q-value < 0.1) from Rhodes et al.
